# Supplementary material
Source: PubMed Central journal article supplement (PMC3896609)
Supplement: mabs-5-956-s01.pdf [file mabs-5-956-s01.pdf]

## **Supplemental Material to:**

**Hao Chen Xiuyun Ding, Yuan Gao, Xiaohua Jiang,  
Xiaolan Liu, Yong Chen, Jianen Gao, Xiaping  
Zhou, Zhiming Cai, and Qihong Sun**

**Inhibition of angiogenesis by a novel neutralizing  
antibody targeting human VEGFR-3**

**2013; mAbs 5(6)**

**<http://dx.doi.org/10.4161/mabs.26239>**

**<http://www.landesbioscience.com/journals/mabs/article/26239/>**

# Supplementary Figure 1

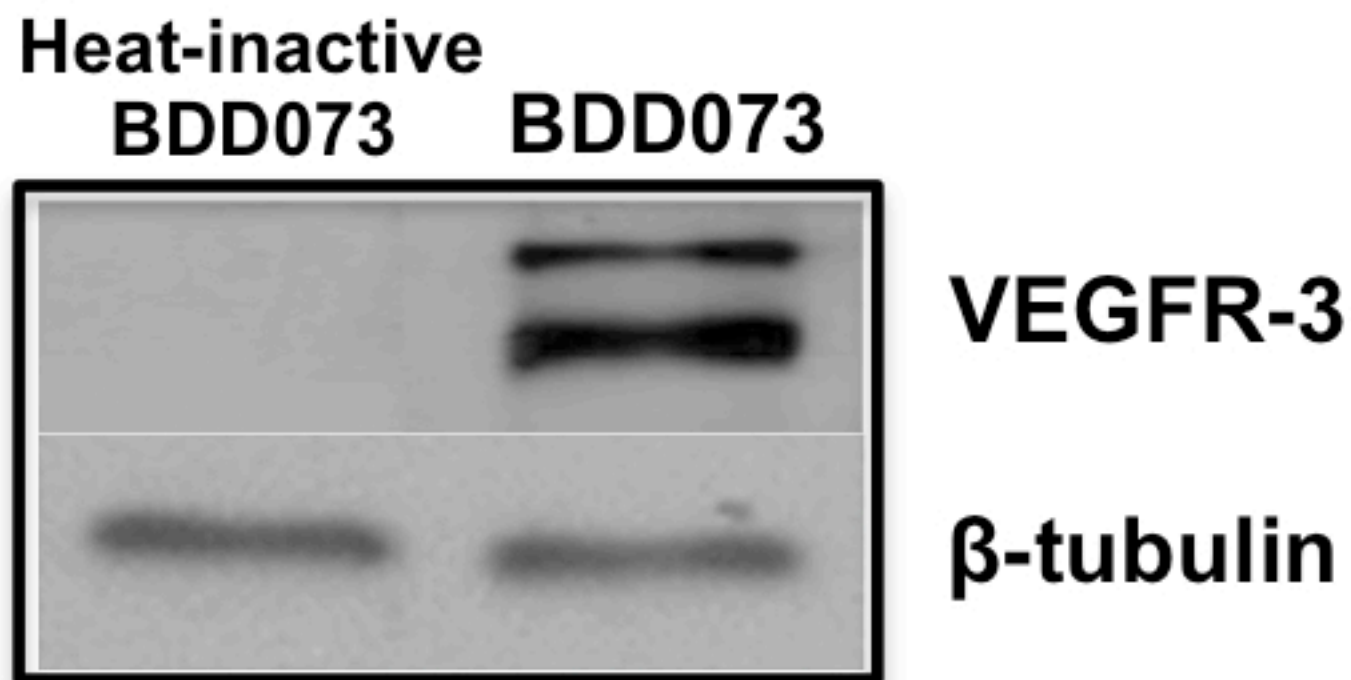

**Supplementary Figure 2**

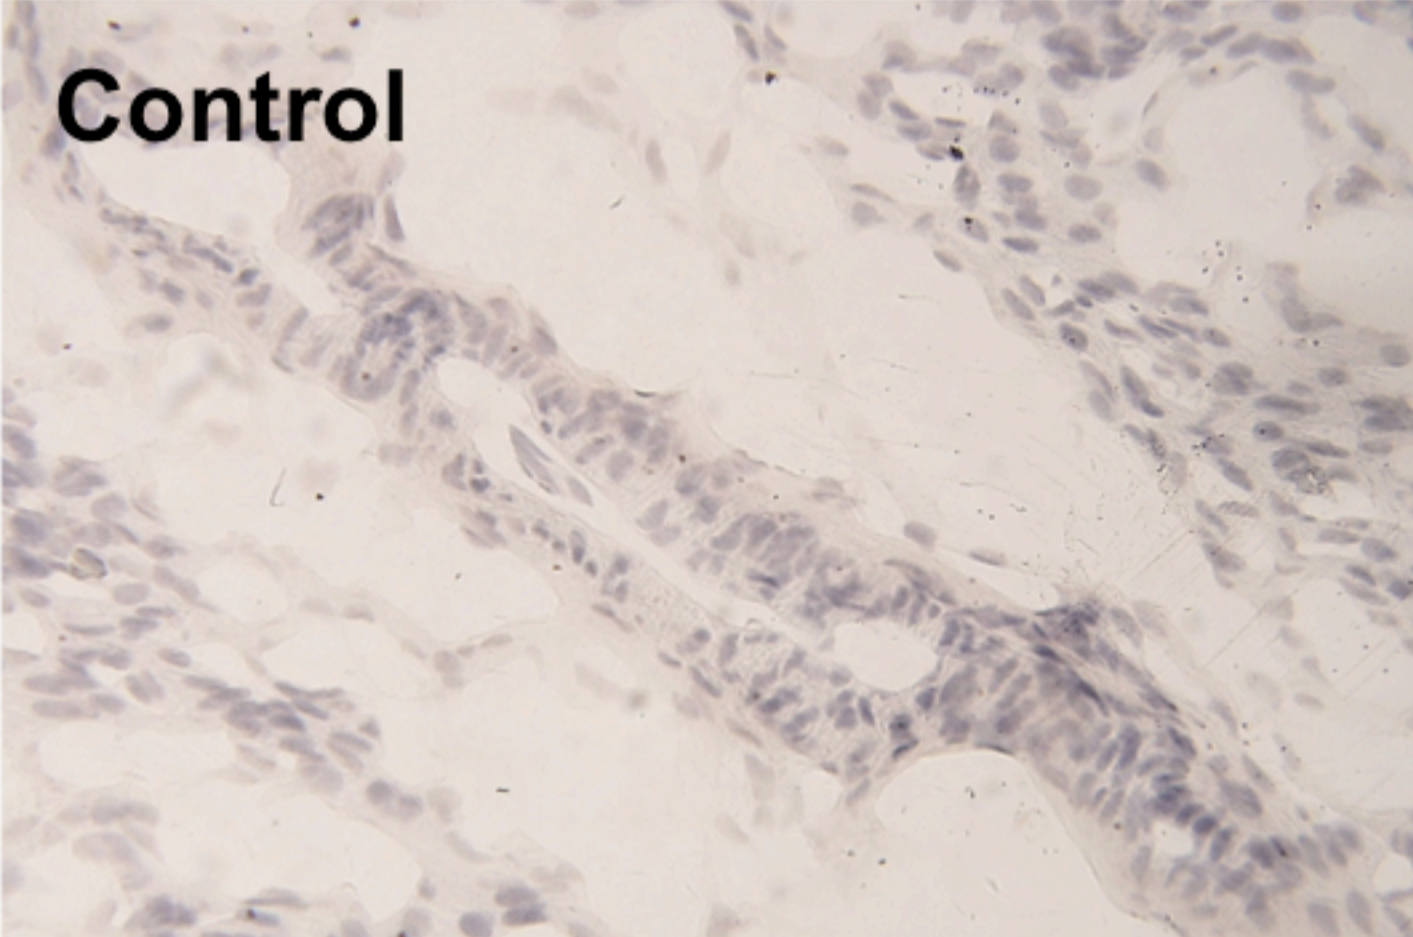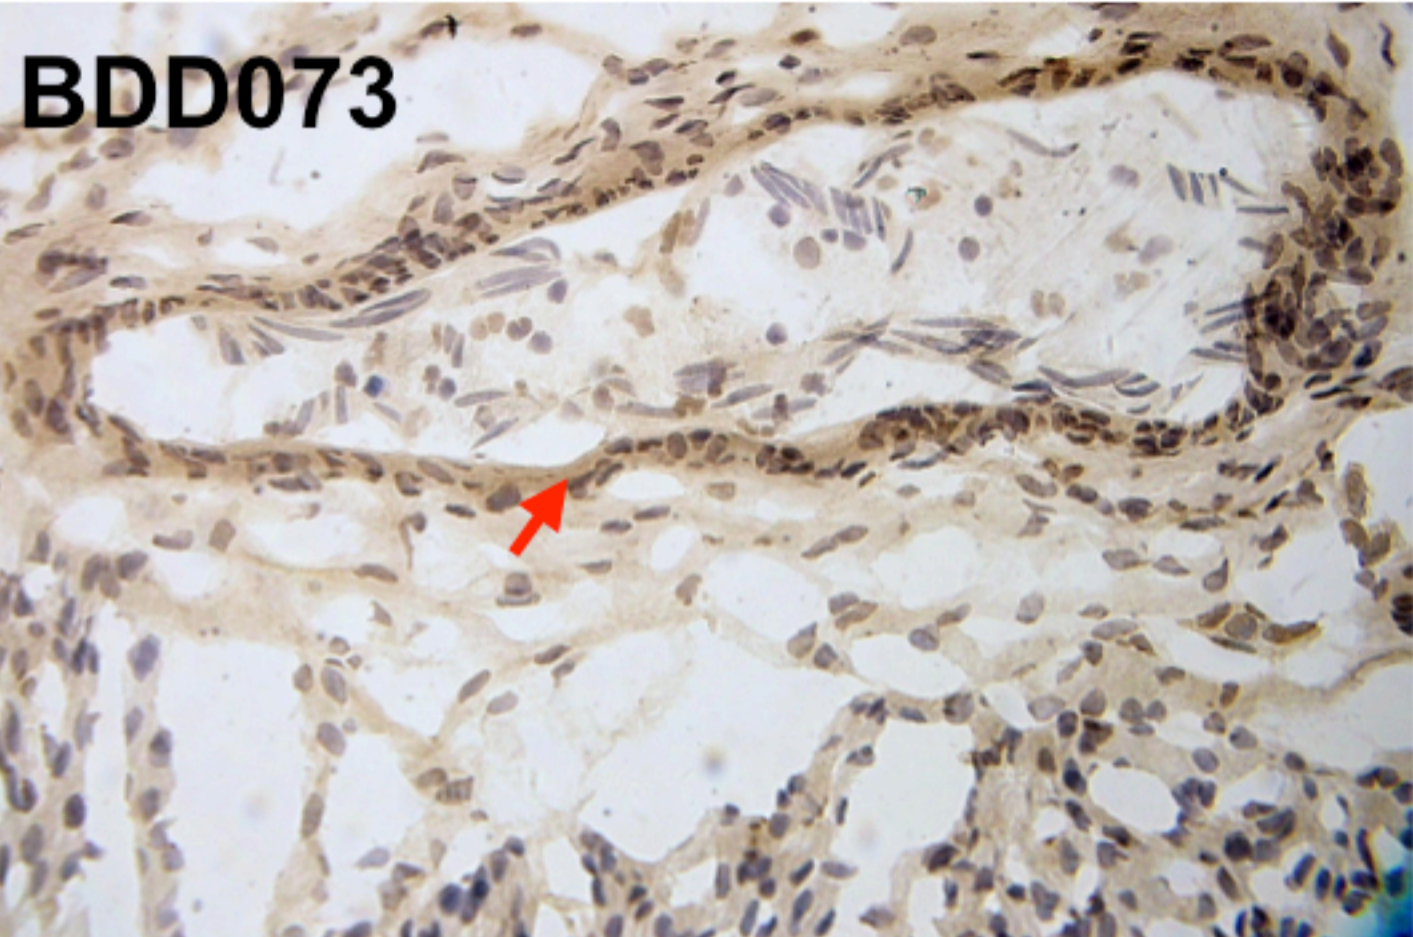

**Fetal heart**

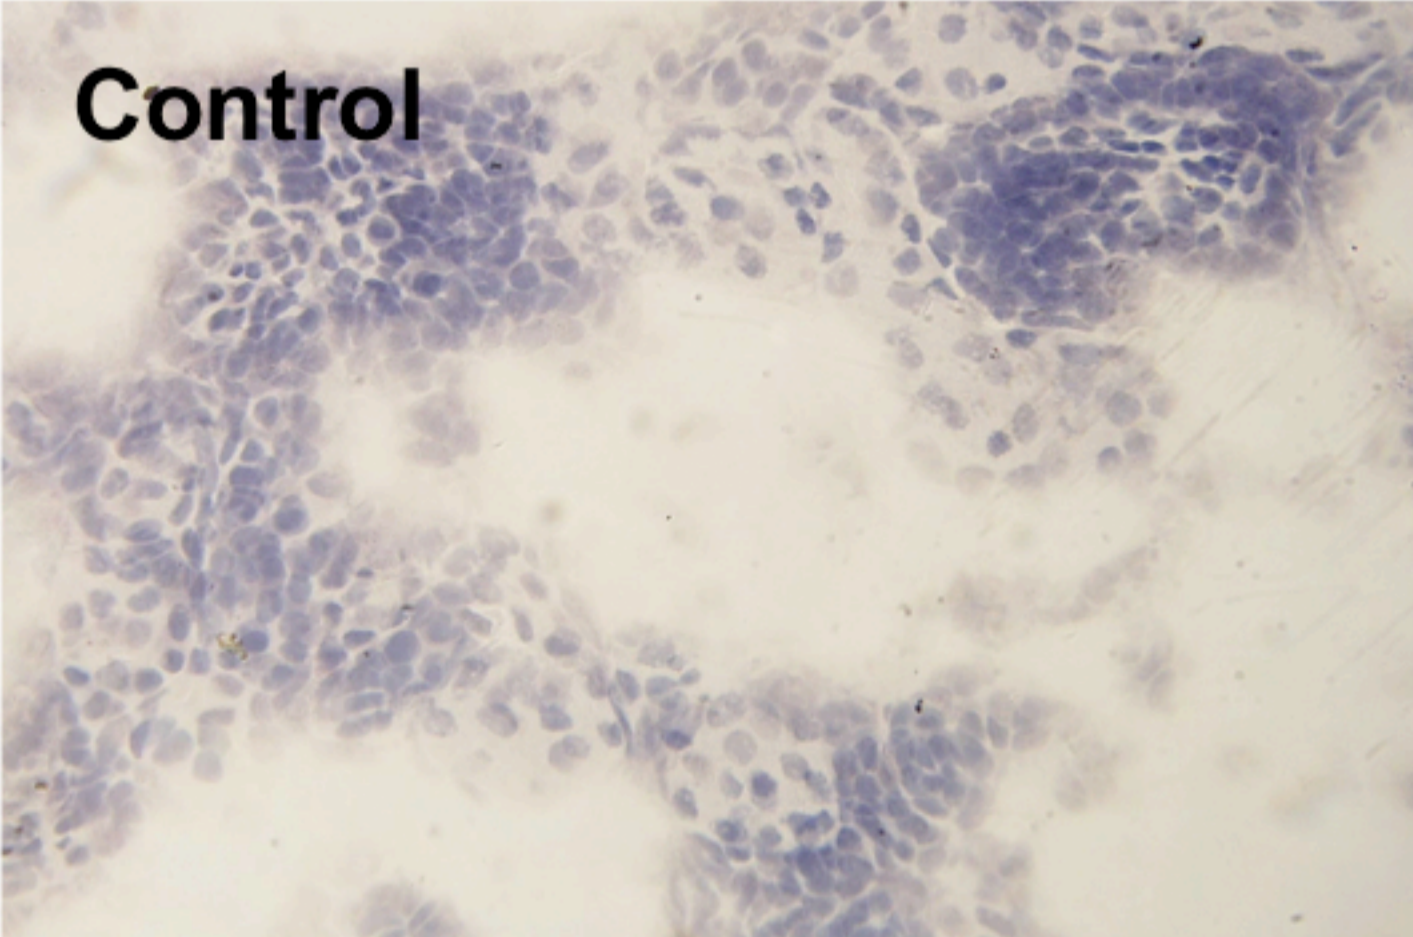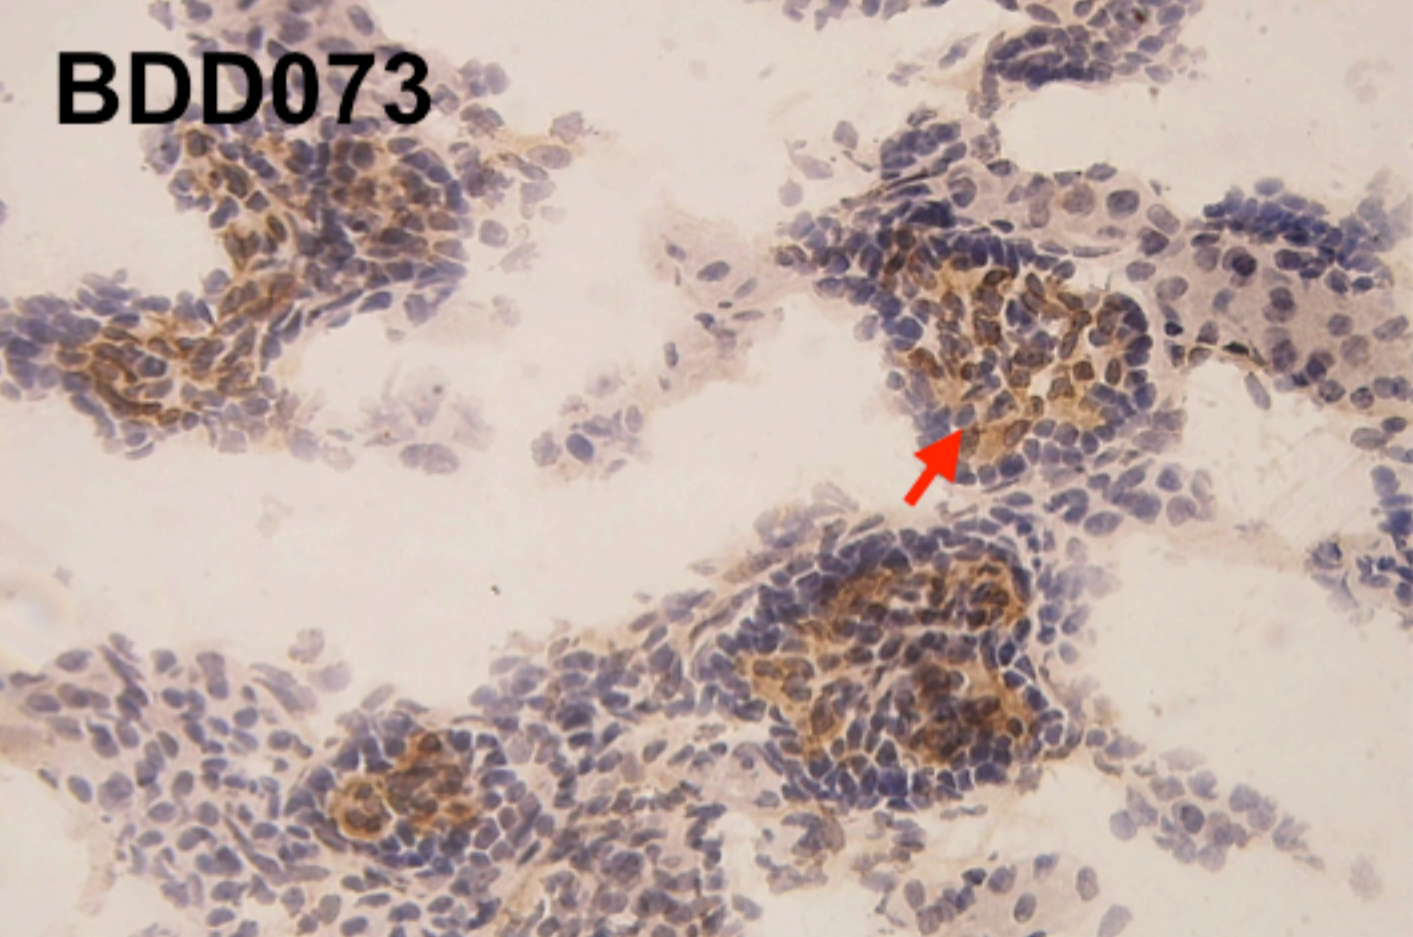

**Fetal kidney**
